# Supplementary material
Source: publisher site journal article supplement (https://www.dovepress.com/get_supplementary_file.php?f=301156.docx)
Supplement: Supplementary file 1 [file get_supplementary_file.php]

**Supplementary Material**

**
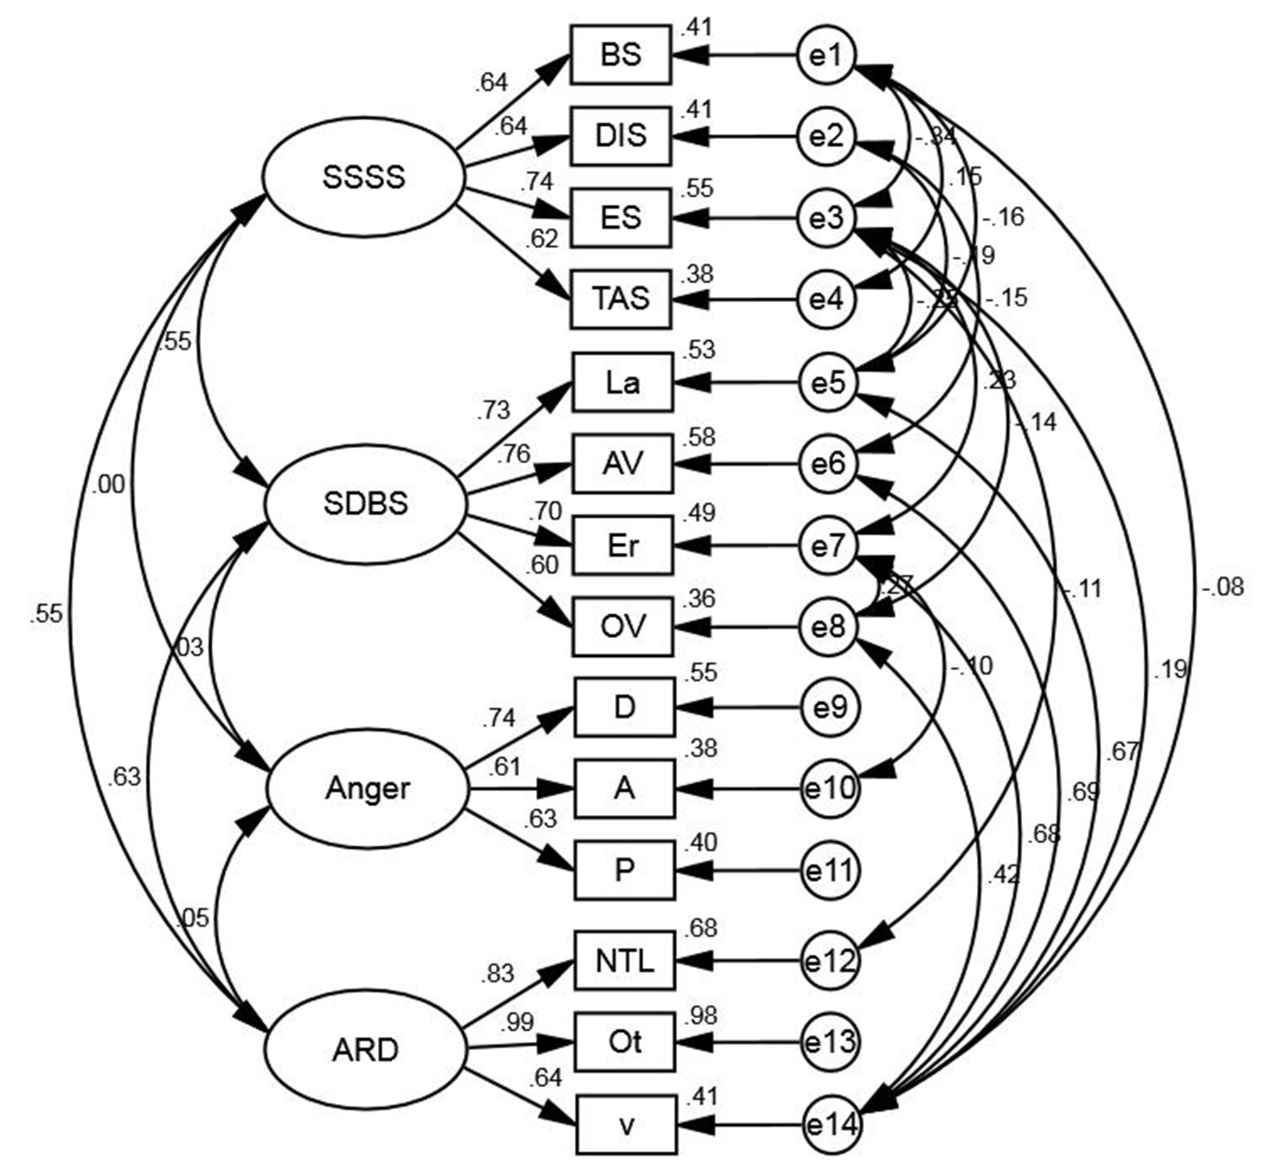
**

**Figure S1** The CFA model for anger**.**

**
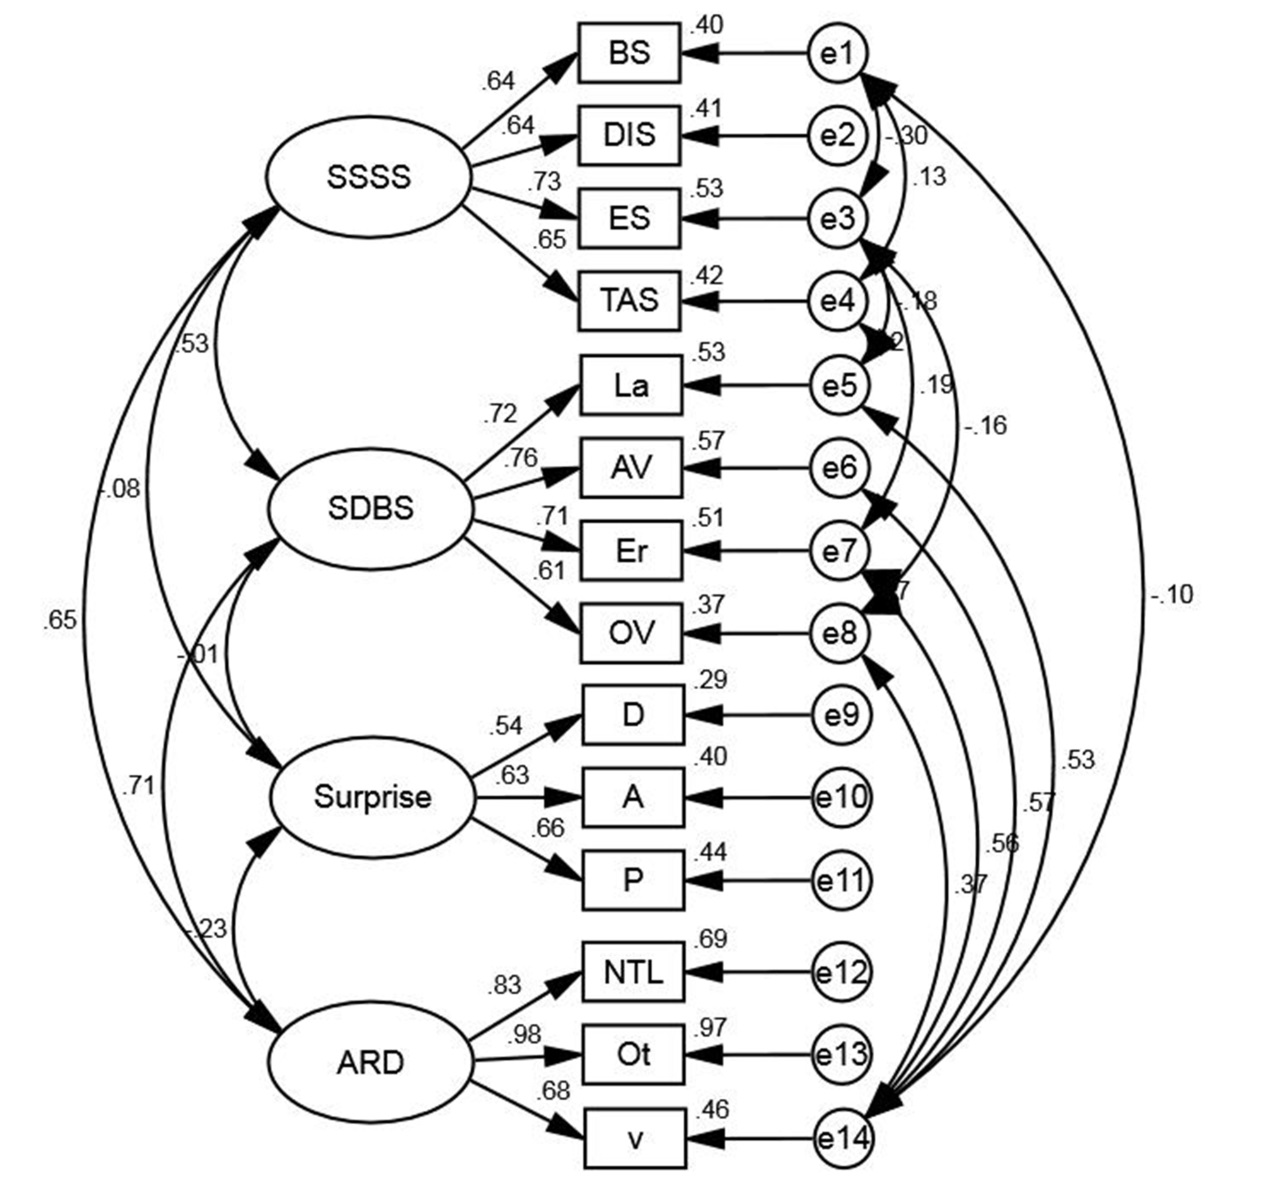
**

**Figure S2** The CFA model for surprise**.**

**
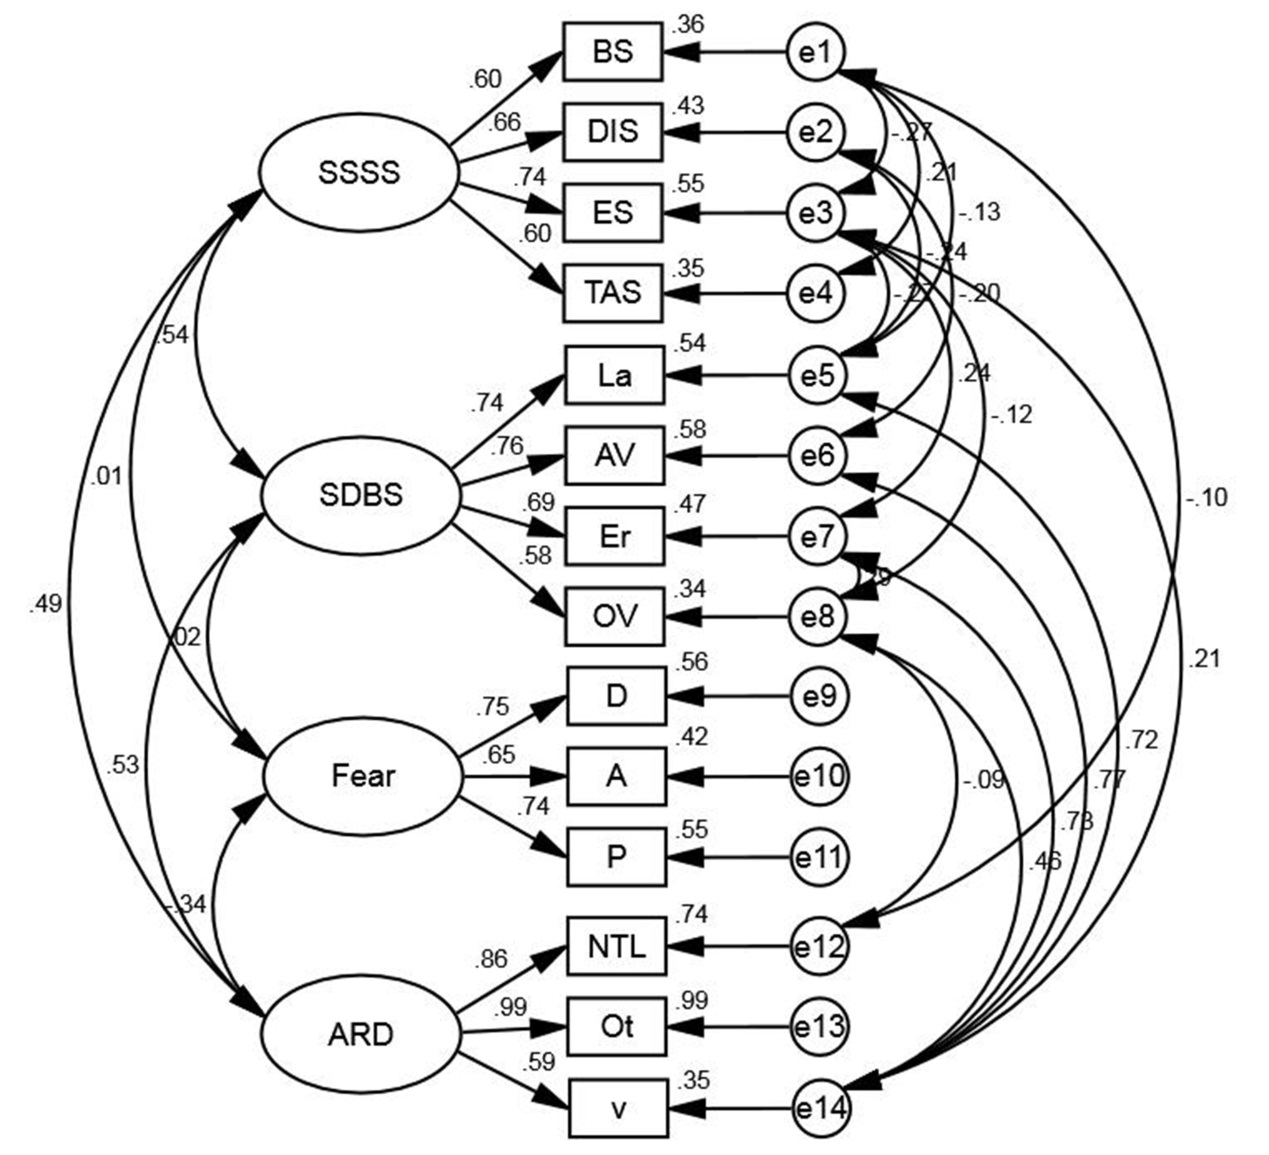
**

**Figure S3** The CFA model for fear**.**

**
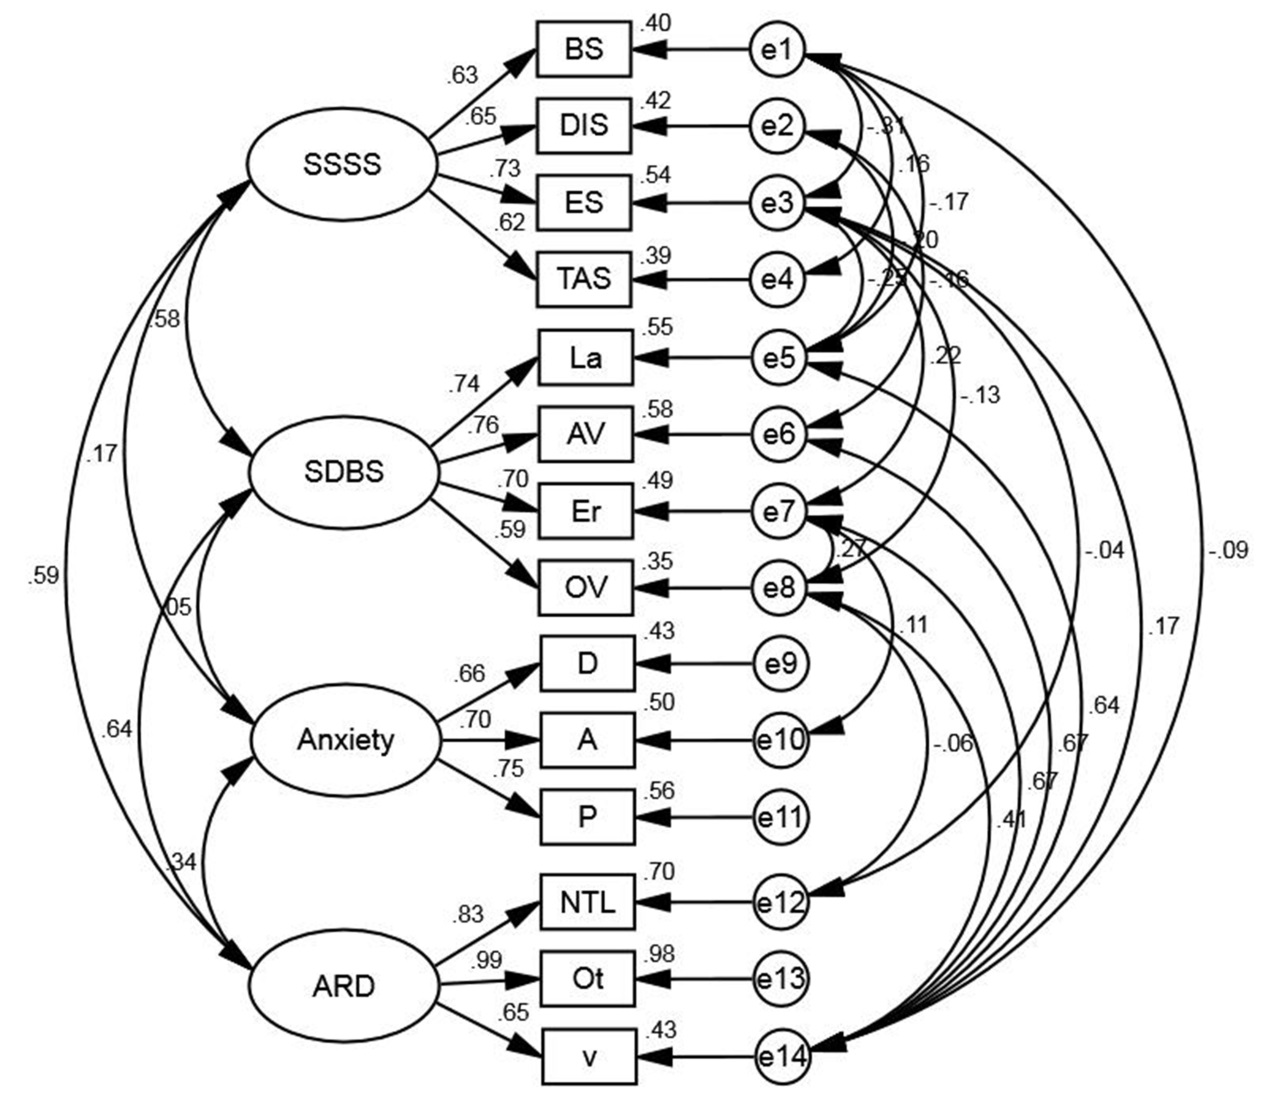
**

**Figure S4** The CFA model for anxiety**.**

**
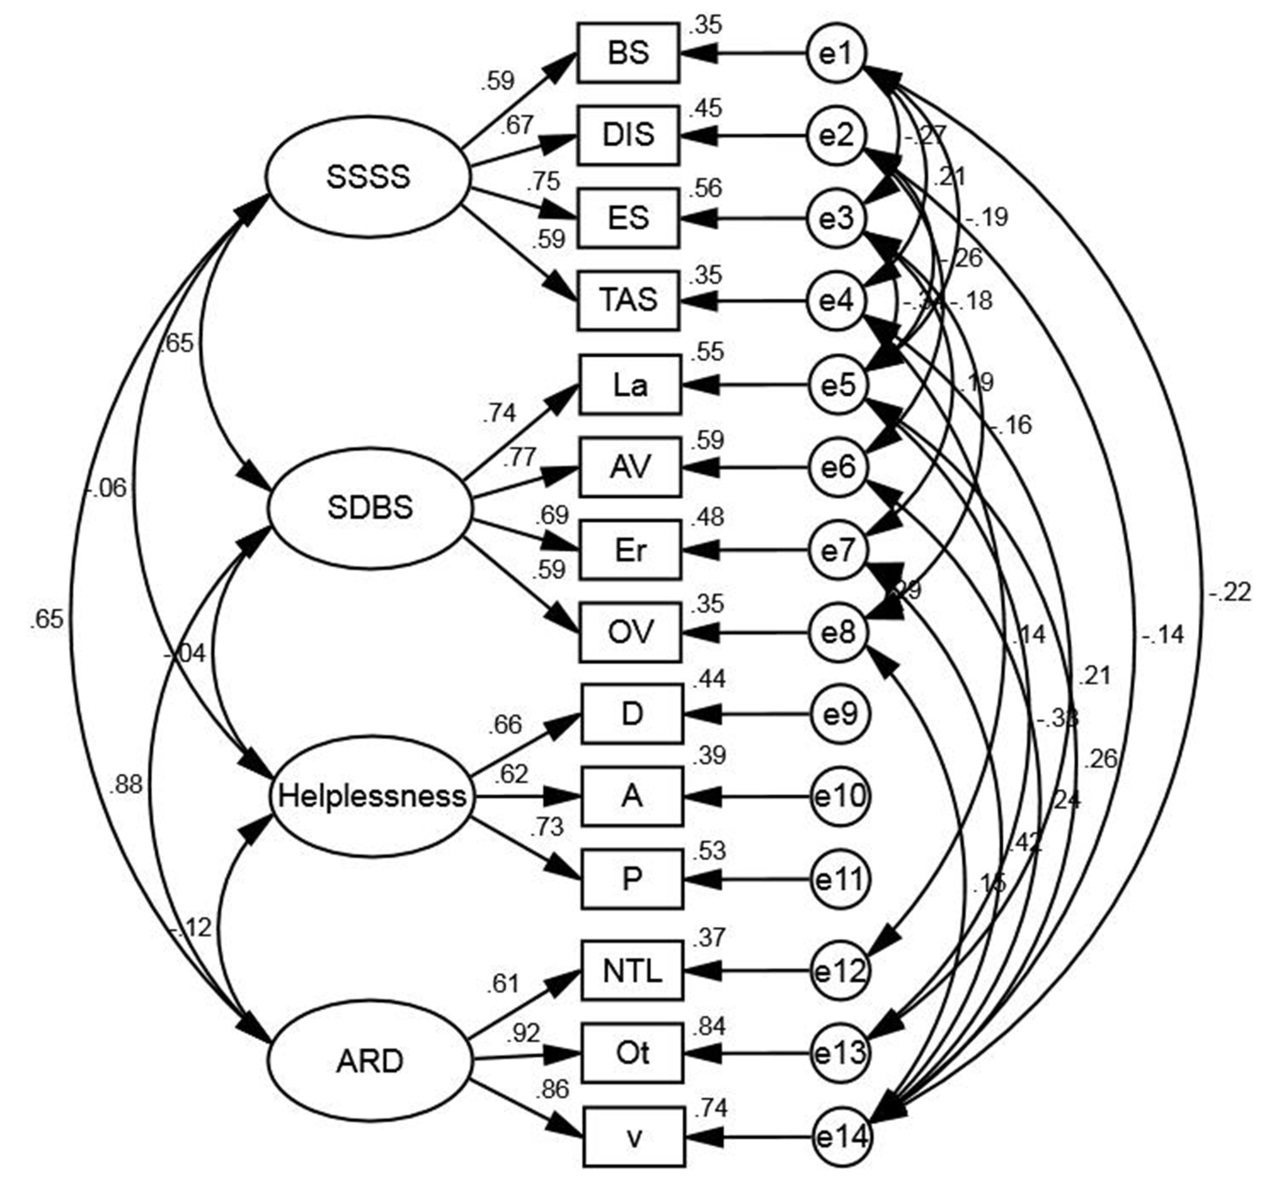
**

**Figure S5** The CFA model for helplessness**.**

**
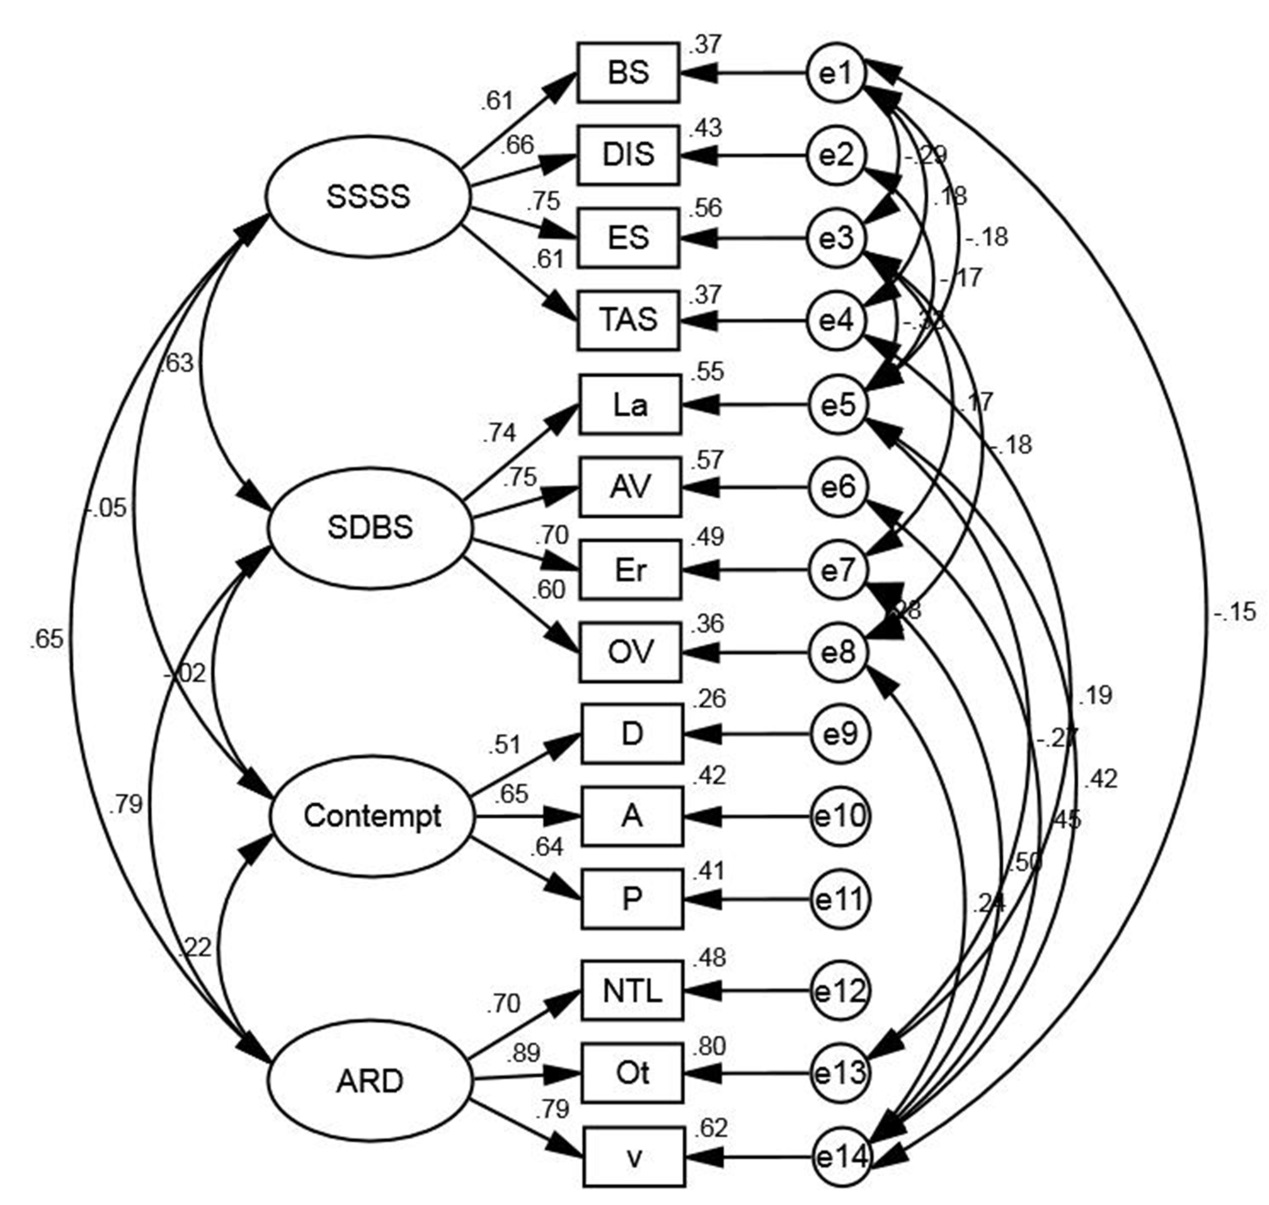
**

**Figure S6** The CFA model for contempt**.**

**
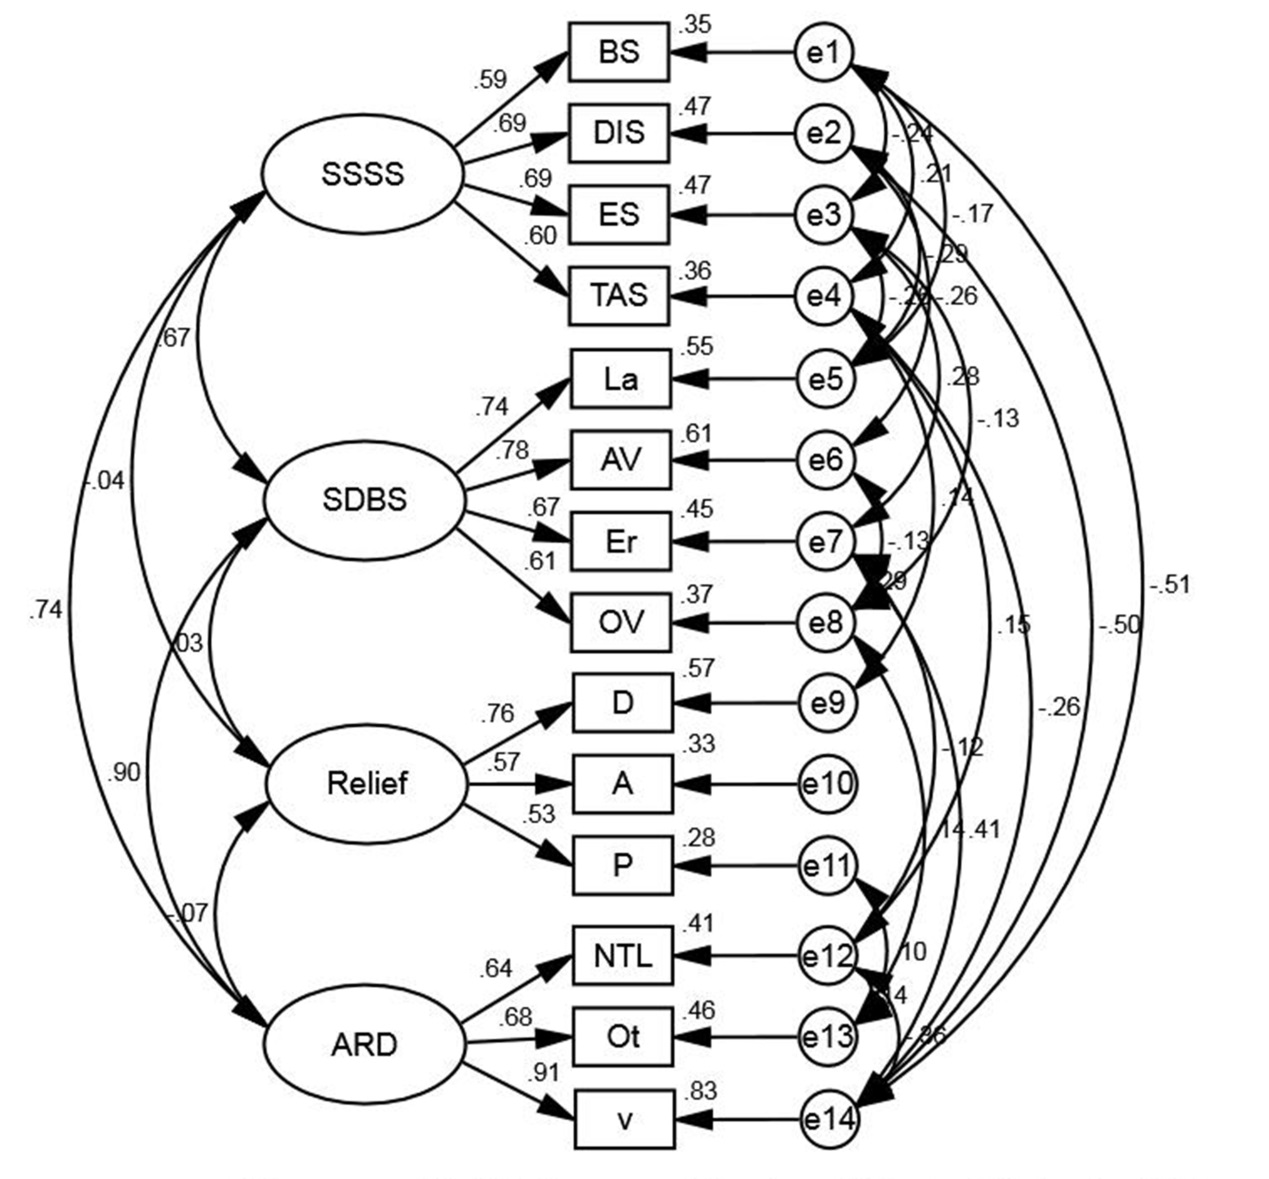
**

**Figure S7** The CFA model for relief**.**

**
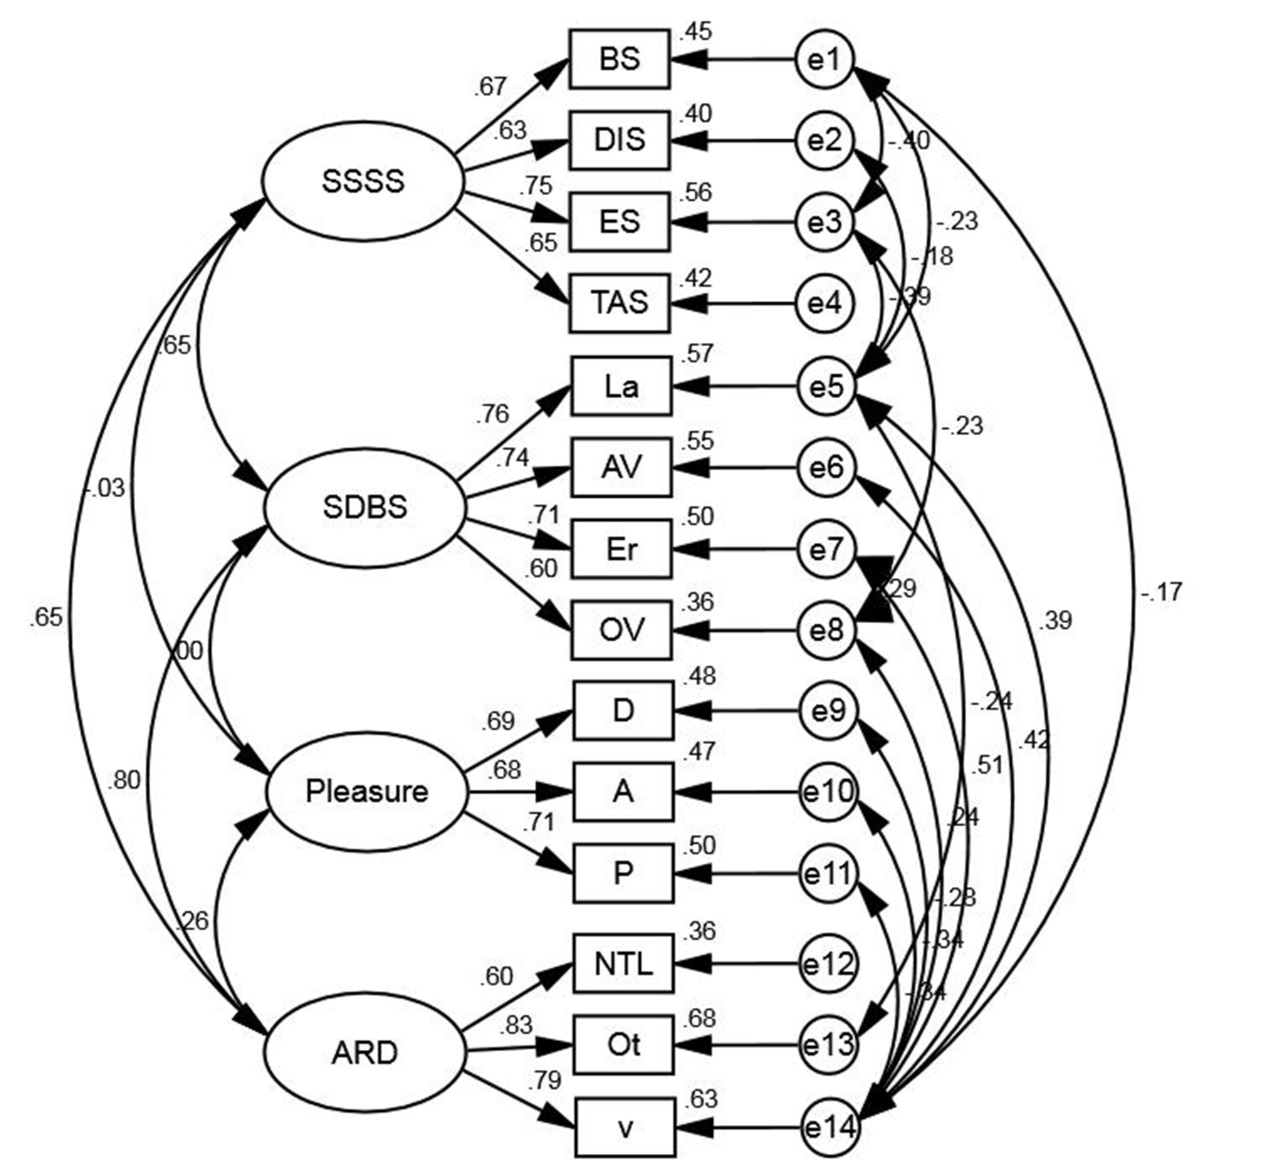
**

**Figure S8** The CFA model for pleasure**.**

**Table S1** CFA result (anger)

| **Path** | | | **NPC** | **SE** | **t** | **Sig** | **SPC** | **AVE** | **CR** |
| --- | --- | --- | --- | --- | --- | --- | --- | --- | --- |
| BS | <--- | SSSS | 1.000 | - | - | - | 0.637 | 0.437 | 0.755 |
| DIS | <--- | SSSS | 1.131 | 0.114 | 9.938 | *** | 0.639 |
| ES | <--- | SSSS | 1.318 | 0.125 | 10.548 | *** | 0.741 |
| TAS | <--- | SSSS | 1.044 | 0.089 | 11.681 | *** | 0.620 |
| La | <--- | SDBS | 1.000 | - | - | - | 0.731 | 0.488 | 0.791 |
| AV | <--- | SDBS | 0.670 | 0.043 | 15.463 | *** | 0.759 |
| Er | <--- | SDBS | 0.967 | 0.066 | 14.645 | *** | 0.697 |
| OV | <--- | SDBS | 0.858 | 0.069 | 12.457 | *** | 0.596 |
| D | <--- | Anger | 1.000 | - | - | - | 0.743 | 0.444 | 0.704 |
| A | <--- | Anger | 0.809 | 0.082 | 9.815 | *** | 0.615 |
| P | <--- | Anger | 0.836 | 0.085 | 9.846 | *** | 0.633 |
| NTL | <--- | ARD | 1.000 | - | - | - | 0.825 | 0.690 | 0.867 |
| Ot | <--- | ARD | 1.306 | 0.052 | 24.879 | *** | 0.991 |
| *v* | <--- | ARD | 4.487 | 0.255 | 17.579 | *** | 0.637 |

**Notes:** *** p<0.01, ** p<0.05, * p< 0.1.

**Abbreviations:** NPC, non-standard path coefficient; SE, standard error; Sig, significance; SPC, standard path coefficient; CR, combined reliability; AVE, average variance extracted.

BS, boredom susceptibility; DIS, disinhibition; ES, experience seeking; TAS, thrill and adventure seeking; La, lapses; AV, aggressive violations; Er, errors; OV, ordinary violations; P, Pleasure-displeasure; A, Arousal-nonarousal; D, Dominance-submissiveness; *v*, driving speed; Ot, number of overtaking; NTL, number of changing lane without turning light; SDBS, self-reported risky driving style; SSSS, self-reported sensation seeking; ARD, actual risky driving behaviors.

**Table S2** CFA result (surprise)

| **Path** | | | **NPC** | **SE** | **t** | **Sig** | **SPC** | **AVE** | **CR** |
| --- | --- | --- | --- | --- | --- | --- | --- | --- | --- |
| BS | <--- | SSSS | 1.000 | - | - | - | 0.636 | 0.441 | 0.759 |
| DIS | <--- | SSSS | 1.143 | 0.109 | 10.473 | *** | 0.642 |
| ES | <--- | SSSS | 1.302 | 0.120 | 10.823 | *** | 0.726 |
| TAS | <--- | SSSS | 1.097 | 0.090 | 12.166 | *** | 0.647 |
| La | <--- | SDBS | 1.000 | - | - | - | 0.725 | 0.494 | 0.795 |
| AV | <--- | SDBS | 0.674 | 0.043 | 15.818 | *** | 0.758 |
| Er | <--- | SDBS | 0.998 | 0.066 | 15.085 | *** | 0.713 |
| OV | <--- | SDBS | 0.883 | 0.069 | 12.766 | *** | 0.607 |
| D | <--- | Surprise | 1.000 | - | - | - | 0.541 | 0.377 | 0.643 |
| A | <--- | Surprise | 1.287 | 0.153 | 8.421 | *** | 0.632 |
| P | <--- | Surprise | 1.387 | 0.166 | 8.373 | *** | 0.662 |
| NTL | <--- | ARD | 1.000 | - | - | - | 0.833 | 0.707 | 0.876 |
| Ot | <--- | ARD | 1.301 | 0.047 | 27.978 | *** | 0.984 |
| *v* | <--- | ARD | 4.418 | 0.236 | 18.726 | *** | 0.678 |

**Notes:** *** p<0.01, ** p<0.05, * p< 0.1.

**Abbreviations:** NPC, non-standard path coefficient; SE, standard error; Sig, significance; SPC, standard path coefficient; CR, combined reliability; AVE, average variance extracted.

BS, boredom susceptibility; DIS, disinhibition; ES, experience seeking; TAS, thrill and adventure seeking; La, lapses; AV, aggressive violations; Er, errors; OV, ordinary violations; P, Pleasure-displeasure; A, Arousal-nonarousal; D, Dominance-submissiveness; *v*, driving speed; Ot, number of overtaking; NTL, number of changing lane without turning light; SDBS, self-reported risky driving style; SSSS, self-reported sensation seeking; ARD, actual risky driving behaviors.

**Table S3** CFA result (fear)

| **Path** | | | **NPC** | **SE** | **t** | **Sig** | **SPC** | **AVE** | **CR** |
| --- | --- | --- | --- | --- | --- | --- | --- | --- | --- |
| BS | <--- | SSSS | 1.000 | - | - | - | 0.598 | 0.423 | 0.744 |
| DIS | <--- | SSSS | 1.251 | 0.127 | 9.855 | *** | 0.660 |
| ES | <--- | SSSS | 1.403 | 0.136 | 10.324 | *** | 0.739 |
| TAS | <--- | SSSS | 1.073 | 0.094 | 11.415 | *** | 0.595 |
| La | <--- | SDBS | 1.000 | - | - | - | 0.736 | 0.482 | 0.787 |
| AV | <--- | SDBS | 0.665 | 0.044 | 15.153 | *** | 0.759 |
| Er | <--- | SDBS | 0.947 | 0.066 | 14.346 | *** | 0.686 |
| OV | <--- | SDBS | 0.831 | 0.069 | 12.125 | *** | 0.583 |
| D | <--- | Fear | 1.000 | - | - | - | 0.748 | 0.512 | 0.758 |
| A | <--- | Fear | 0.887 | 0.069 | 12.792 | *** | 0.650 |
| P | <--- | Fear | 1.027 | 0.076 | 13.509 | *** | 0.744 |
| NTL | <--- | ARD | 1.000 | - | - | - | 0.859 | 0.692 | 0.866 |
| Ot | <--- | ARD | 1.263 | 0.045 | 27.753 | *** | 0.993 |
| *v* | <--- | ARD | 3.664 | 0.225 | 16.310 | *** | 0.594 |

**Notes:** *** p<0.01, ** p<0.05, * p< 0.1.

**Abbreviations:** NPC, non-standard path coefficient; SE, standard error; Sig, significance; SPC, standard path coefficient; CR, combined reliability; AVE, average variance extracted.

BS, boredom susceptibility; DIS, disinhibition; ES, experience seeking; TAS, thrill and adventure seeking; La, lapses; AV, aggressive violations; Er, errors; OV, ordinary violations; P, Pleasure-displeasure; A, Arousal-nonarousal; D, Dominance-submissiveness; *v*, driving speed; Ot, number of overtaking; NTL, number of changing lane without turning light; SDBS, self-reported risky driving style; SSSS, self-reported sensation seeking; ARD, actual risky driving behaviors.

**Table S4** CFA result (anxiety)

| **Path** | | | **NPC** | **SE** | **t** | **Sig** | **SPC** | **AVE** | **CR** |
| --- | --- | --- | --- | --- | --- | --- | --- | --- | --- |
| BS | <--- | SSSS | 1.000 | - | - | - | 0.629 | 0.437 | 0.755 |
| DIS | <--- | SSSS | 1.167 | 0.113 | 10.322 | *** | 0.651 |
| ES | <--- | SSSS | 1.327 | 0.124 | 10.709 | *** | 0.734 |
| TAS | <--- | SSSS | 1.062 | 0.089 | 11.961 | *** | 0.623 |
| La | <--- | SDBS | 1.000 | - | - | - | 0.740 | 0.490 | 0.792 |
| AV | <--- | SDBS | 0.662 | 0.042 | 15.852 | *** | 0.759 |
| Er | <--- | SDBS | 0.960 | 0.064 | 14.937 | *** | 0.697 |
| OV | <--- | SDBS | 0.840 | 0.067 | 12.599 | *** | 0.592 |
| D | <--- | Anxiety | 1.000 | - | - | - | 0.658 | 0.495 | 0.746 |
| A | <--- | Anxiety | 1.140 | 0.093 | 12.215 | *** | 0.704 |
| P | <--- | Anxiety | 1.158 | 0.094 | 12.378 | *** | 0.746 |
| NTL | <--- | ARD | 1.000 | *-* | *-* | *-* | 0.834 | 0.702 | 0.873 |
| Ot | <--- | ARD | 1.244 | 0.046 | 27.075 | *** | 0.992 |
| *v* | <--- | ARD | 4.154 | 0.230 | 18.045 | *** | 0.652 |

**Notes:** *** p<0.01, ** p<0.05, * p< 0.1.

**Abbreviations:** NPC, non-standard path coefficient; SE, standard error; Sig, significance; SPC, standard path coefficient; CR, combined reliability; AVE, average variance extracted.

BS, boredom susceptibility; DIS, disinhibition; ES, experience seeking; TAS, thrill and adventure seeking; La, lapses; AV, aggressive violations; Er, errors; OV, ordinary violations; P, Pleasure-displeasure; A, Arousal-nonarousal; D, Dominance-submissiveness; *v*, driving speed; Ot, number of overtaking; NTL, number of changing lane without turning light; SDBS, self-reported risky driving style; SSSS, self-reported sensation seeking; ARD, actual risky driving behaviors.

**Table S5** CFA result (helplessness)

| **Path** | | | **NPC** | **SE** | **t** | **Sig** | **SPC** | **AVE** | **CR** |
| --- | --- | --- | --- | --- | --- | --- | --- | --- | --- |
| BS | <--- | SSSS | 1.000 | - | - | - | 0.591 | 0.429 | 0.749 |
| DIS | <--- | SSSS | 1.287 | 0.128 | 10.089 | *** | 0.673 |
| ES | <--- | SSSS | 1.454 | 0.139 | 10.473 | *** | 0.749 |
| TAS | <--- | SSSS | 1.075 | 0.095 | 11.318 | *** | 0.594 |
| La | <--- | SDBS | 1.000 | - | - | - | 0.738 | 0.490 | 0.792 |
| AV | <--- | SDBS | 0.670 | 0.042 | 15.970 | *** | 0.765 |
| Er | <--- | SDBS | 0.961 | 0.065 | 14.844 | *** | 0.693 |
| OV | <--- | SDBS | 0.845 | 0.066 | 12.826 | *** | 0.593 |
| D | <--- | Helplessness | 1.000 | - | - | - | 0.664 | 0.453 | 0.712 |
| A | <--- | Helplessness | 0.895 | 0.086 | 10.464 | *** | 0.622 |
| P | <--- | Helplessness | 1.023 | 0.099 | 10.340 | *** | 0.729 |
| NTL | <--- | ARD | 1.000 | - | - | - | 0.606 | 0.652 | 0.845 |
| Ot | <--- | ARD | 2.091 | 0.130 | 16.027 | *** | 0.919 |
| *v* | <--- | ARD | 8.075 | 0.513 | 15.744 | *** | 0.862 |

**Notes:** *** p<0.01, ** p<0.05, * p< 0.1.

**Abbreviations:** NPC, non-standard path coefficient; SE, standard error; Sig, significance; SPC, standard path coefficient; CR, combined reliability; AVE, average variance extracted.

BS, boredom susceptibility; DIS, disinhibition; ES, experience seeking; TAS, thrill and adventure seeking; La, lapses; AV, aggressive violations; Er, errors; OV, ordinary violations; P, Pleasure-displeasure; A, Arousal-nonarousal; D, Dominance-submissiveness; *v*, driving speed; Ot, number of overtaking; NTL, number of changing lane without turning light; SDBS, self-reported risky driving style; SSSS, self-reported sensation seeking; ARD, actual risky driving behaviors.

**Table S6** CFA result (contempt)

| **Path** | | | **NPC** | **SE** | **t** | **Sig** | **SPC** | **AVE** | **CR** |
| --- | --- | --- | --- | --- | --- | --- | --- | --- | --- |
| BS | <--- | SSSS | 1.000 | - | - | - | 0.610 | 0.435 | 0.753 |
| DIS | <--- | SSSS | 1.221 | 0.120 | 10.208 | *** | 0.657 |
| ES | <--- | SSSS | 1.411 | 0.133 | 10.596 | *** | 0.750 |
| TAS | <--- | SSSS | 1.079 | 0.094 | 11.489 | *** | 0.611 |
| La | <--- | SDBS | 1.000 | - | - | - | 0.745 | 0.493 | 0.794 |
| AV | <--- | SDBS | 0.653 | 0.041 | 15.843 | *** | 0.753 |
| Er | <--- | SDBS | 0.955 | 0.064 | 14.877 | *** | 0.698 |
| OV | <--- | SDBS | 0.850 | 0.066 | 12.861 | *** | 0.602 |
| D | <--- | Contempt | 1.000 | - | - | - | 0.507 | 0.362 | 0.627 |
| A | <--- | Contempt | 1.469 | 0.185 | 7.954 | *** | 0.648 |
| P | <--- | Contempt | 1.338 | 0.168 | 7.967 | *** | 0.639 |
| NTL | <--- | ARD | 1.000 | - | - | - | 0.695 | 0.635 | 0.838 |
| Ot | <--- | ARD | 1.491 | 0.082 | 18.109 | *** | 0.893 |
| *v* | <--- | ARD | 5.302 | 0.311 | 17.035 | *** | 0.790 |

**Notes:** *** p<0.01, ** p<0.05, * p< 0.1.

**Abbreviations:** NPC, non-standard path coefficient; SE, standard error; Sig, significance; SPC, standard path coefficient; CR, combined reliability; AVE, average variance extracted.

BS, boredom susceptibility; DIS, disinhibition; ES, experience seeking; TAS, thrill and adventure seeking; La, lapses; AV, aggressive violations; Er, errors; OV, ordinary violations; P, Pleasure-displeasure; A, Arousal-nonarousal; D, Dominance-submissiveness; *v*, driving speed; Ot, number of overtaking; NTL, number of changing lane without turning light; SDBS, self-reported risky driving style; SSSS, self-reported sensation seeking; ARD, actual risky driving behaviors.

**Table S7** CFA result (relief)

| **Path** | | | **NPC** | **SE** | **t** | **Sig** | **SPC** | **AVE** | **CR** |
| --- | --- | --- | --- | --- | --- | --- | --- | --- | --- |
| BS | <--- | SSSS | 1.000 | - | - | - | 0.588 | 0.411 | 0.736 |
| DIS | <--- | SSSS | 1.306 | 0.130 | 10.082 | *** | 0.685 |
| ES | <--- | SSSS | 1.340 | 0.132 | 10.162 | *** | 0.686 |
| TAS | <--- | SSSS | 1.087 | 0.094 | 11.592 | *** | 0.600 |
| La | <--- | SDBS | 1.000 | - | - | - | 0.740 | 0.495 | 0.795 |
| AV | <--- | SDBS | 0.684 | 0.039 | 17.586 | *** | 0.782 |
| Er | <--- | SDBS | 0.930 | 0.061 | 15.139 | *** | 0.668 |
| OV | <--- | SDBS | 0.869 | 0.063 | 13.692 | *** | 0.611 |
| D | <--- | Relief | 1.000 | - | - | - | 0.756 | 0.395 | 0.657 |
| A | <--- | Relief | 0.763 | 0.096 | 7.936 | *** | 0.574 |
| P | <--- | Relief | 0.687 | 0.087 | 7.856 | *** | 0.533 |
| NTL | <--- | ARD | 1.000 | - | - | - | 0.642 | 0.570 | 0.795 |
| Ot | <--- | ARD | 1.516 | .108 | 14.073 | *** | 0.682 |
| *v* | <--- | ARD | 17.177 | 1.172 | 14.654 | *** | 0.913 |

**Notes:** *** p<0.01, ** p<0.05, * p< 0.1.

**Abbreviations:** NPC, non-standard path coefficient; SE, standard error; Sig, significance; SPC, standard path coefficient; CR, combined reliability; AVE, average variance extracted.

BS, boredom susceptibility; DIS, disinhibition; ES, experience seeking; TAS, thrill and adventure seeking; La, lapses; AV, aggressive violations; Er, errors; OV, ordinary violations; P, Pleasure-displeasure; A, Arousal-nonarousal; D, Dominance-submissiveness; *v*, driving speed; Ot, number of overtaking; NTL, number of changing lane without turning light; SDBS, self-reported risky driving style; SSSS, self-reported sensation seeking; ARD, actual risky driving behaviors.

**Table S8** CFA result (pleasure)

| **Path** | | | **NPC** | **SE** | **t** | **Sig** | **SPC** | **AVE** | **CR** |
| --- | --- | --- | --- | --- | --- | --- | --- | --- | --- |
| BS | <--- | SSSS | 1.000 | - | - | - | 0.670 | 0.457 | 0.770 |
| DIS | <--- | SSSS | 1.074 | 0.091 | 11.768 | *** | 0.635 |
| ES | <--- | SSSS | 1.276 | 0.108 | 11.861 | *** | 0.746 |
| TAS | <--- | SSSS | 1.041 | 0.087 | 11.983 | *** | 0.648 |
| La | <--- | SDBS | 1.000 | - | - | - | 0.756 | 0.496 | 0.797 |
| AV | <--- | SDBS | 0.631 | 0.040 | 15.803 | *** | 0.740 |
| Er | <--- | SDBS | 0.957 | 0.063 | 15.157 | *** | 0.710 |
| OV | <--- | SDBS | 0.840 | 0.065 | 12.884 | *** | 0.602 |
| D | <--- | Pleasure | 1.000 | - | - | - | 0.690 | 0.481 | 0.735 |
| A | <--- | Pleasure | 1.032 | 0.088 | 11.679 | *** | 0.684 |
| P | <--- | Pleasure | 1.071 | 0.091 | 11.716 | *** | 0.706 |
| NTL | <--- | ARD | 1.000 |  |  |  | 0.602 | 0.557 | 0.788 |
| Ot | <--- | ARD | 1.879 | 0.131 | 14.376 | *** | 0.826 |
| *v* | <--- | ARD | 6.873 | 0.501 | 13.724 | *** | 0.792 |

**Notes:** *** p<0.01, ** p<0.05, * p< 0.1.

**Abbreviations:** NPC, non-standard path coefficient; SE, standard error; Sig, significance; SPC, standard path coefficient; CR, combined reliability; AVE, average variance extracted.

BS, boredom susceptibility; DIS, disinhibition; ES, experience seeking; TAS, thrill and adventure seeking; La, lapses; AV, aggressive violations; Er, errors; OV, ordinary violations; P, Pleasure-displeasure; A, Arousal-nonarousal; D, Dominance-submissiveness; *v*, driving speed; Ot, number of overtaking; NTL, number of changing lane without turning light; SDBS, self-reported risky driving style; SSSS, self-reported sensation seeking; ARD, actual risky driving behaviors.
